# Supplementary material for: Numerical Investigation of Parameters Influencing Back-Thrust Development in Outer Wedge Fronts of Fold-and-Thrust-Belt Systems
Source: Copernicus journal article supplement (doi:10.5194/egusphere-2024-3134), 2024-11-04

## Supplementary A: Governing equations

Yielding on the left section of the critical state line causes to softening behavior (dilation), while on the right section results to compaction. When the material reaches the point of the critical state line and yield surfaces, it experiences isovolumetric changes. The yield surface is defined through (Crook et al. 2006):

$$\Phi(\sigma, \varepsilon_v^p) = g(\theta, p) \times q - (p - pt) \times \tan\beta \times \left[\frac{p-pc}{pt-pc}\right]^{\frac{1}{n_p}} \quad \text{Eq. A1}$$

Where  $\sigma$ ,  $\varepsilon_v^p$ ,  $\theta$ ,  $p$ ,  $q$ , and  $n_p$  shows stress, volumetric plastic strain, Lode angle, mean effective stress (Eq. 2), deviatoric stress (Eq. 3), and p-q plane shape parameter respectively. Here  $g(\theta, p)$  is implemented to control the shape of the surface:

$$g(\theta, p) = \left[\frac{1}{1-\beta^\pi(p)} \left(1 + \beta^\pi(p) \frac{r^3}{q^3}\right)\right]^{N^\pi} \quad \text{Eq. A2}$$

10 Where

$$\beta^\pi(p) = \beta_0^\pi \exp\left(\beta_1^\pi p \frac{pc^0}{pc}\right) \quad \text{Eq. A3}$$

Here  $pc^0$  and  $pc$  represent the pre-consolidation pressures at the start of deformation and the current state, respectively. These values are used to calculate the material constants of  $\beta_0^\pi$  and  $\beta_1^\pi$ . By taking into account the deviatoric stress tensor as  $S$  and 3<sup>rd</sup> deviatoric stress invariant as  $J'_3$ , following equation can be used to obtain  $r$ :

$$15 \quad r^3 = \frac{9}{2} S : S : S = \frac{27}{2} J'_3 \quad \text{Eq. A4}$$

The compaction or softening behaviour is regulated by adjusting the intercept of the yield surface with the effective mean stress axis which are defined through Eq. A5 and Eq. A6:

$$pc = pc^0 \exp\left[\frac{V\varepsilon_v^p}{\lambda - \kappa}\right] \quad \text{Eq. A5}$$

$$pt = pt^0 \exp\left[\frac{V(\varepsilon_v^p)_{max}}{\lambda - \kappa}\right] \quad \text{Eq. A6}$$

20 Where  $n$  shows the porosity and  $V$  (specific volume) is obtained through:

$$n = \frac{V-1}{V} \quad \text{Eq. A7}$$

Plotting  $V$  against  $\ln(p)$  during loading and unloading results in  $\lambda$  as the angle of inclination of the normal compaction data and  $\kappa$  as the angle of inclination of the offloading curve (Albertz and Lingrey, 2012).

## Supplementary B: Simulation Results Overview

25 The following section presents simulation results for plastic strain, the horizontal-to-vertical stress ratio, deviatoric-to-mean effective stress ratio, and porosity values corresponding to each case identified in the main manuscript. For clarity, each case includes six subplots, featuring plastic strain plots at 2, 4, and 7 Ma. It is important to note that the color legend for the 2 Ma plots remains consistent across all cases, while the color legends for the other two time points vary. The subplots also include horizontal over vertical stress at 7 Ma, maximum shear stress over mean effective stress at 7 Ma, and a porosity field at 7 Ma. Throughout the simulations, 30 sedimentation initiates at 5 Ma and continues until 7 Ma, contributing to the evolution of the depicted parameters.

## Case 1

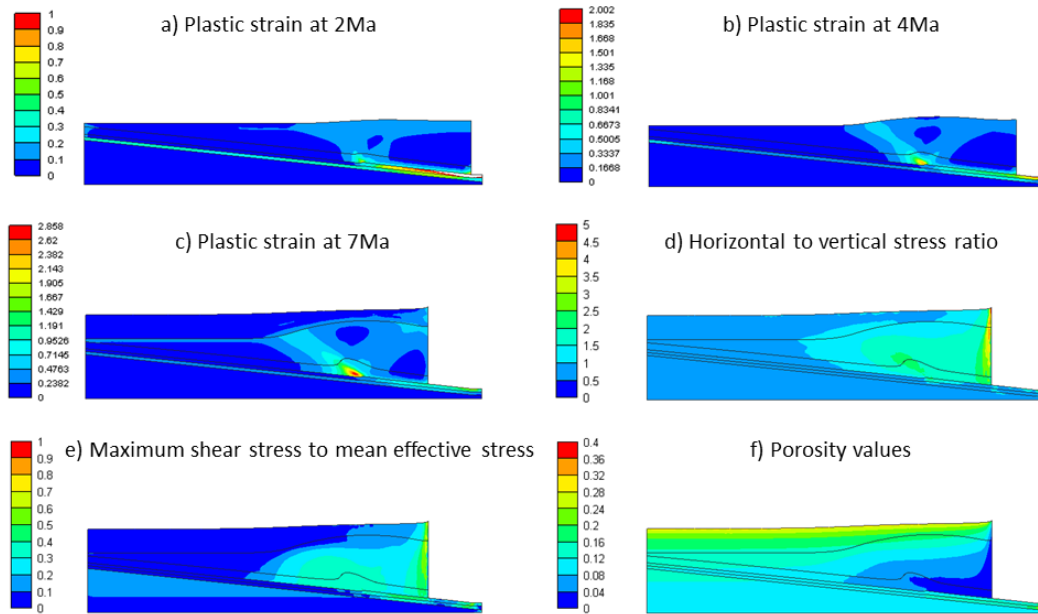

40

45

## Case 2

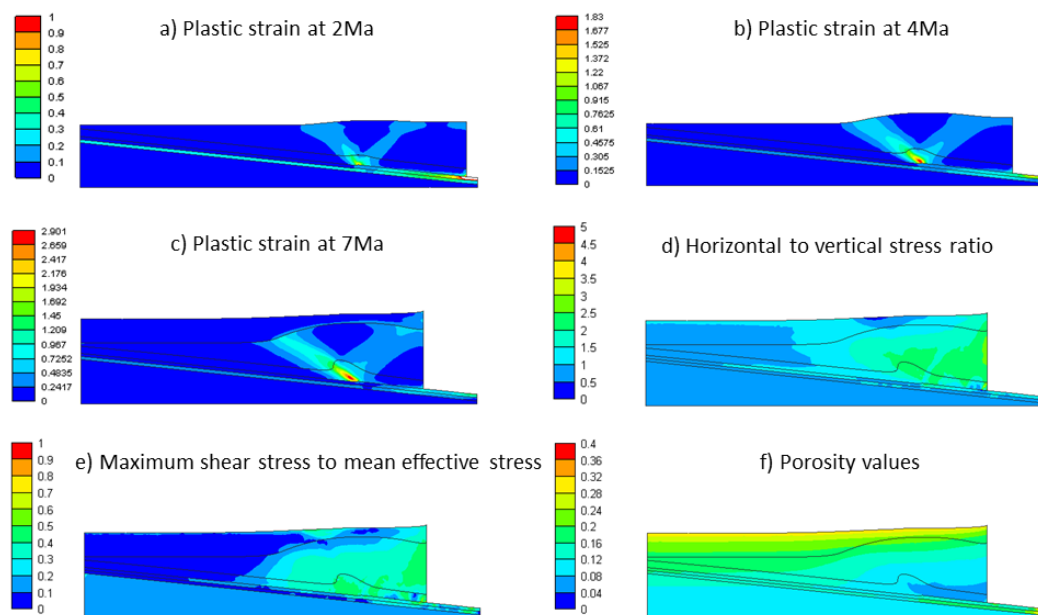

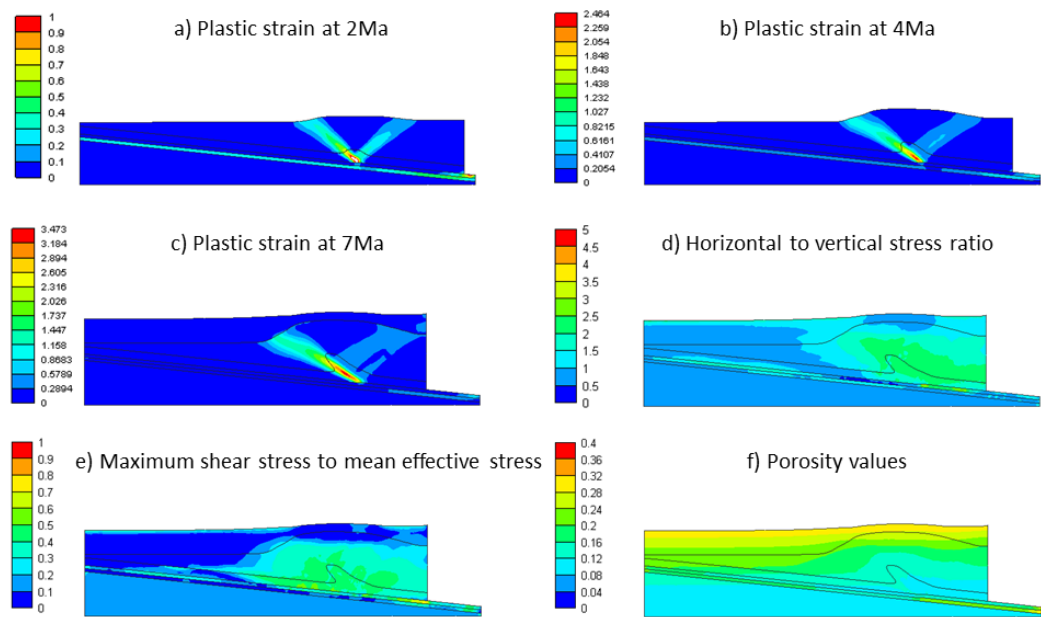

Case 4

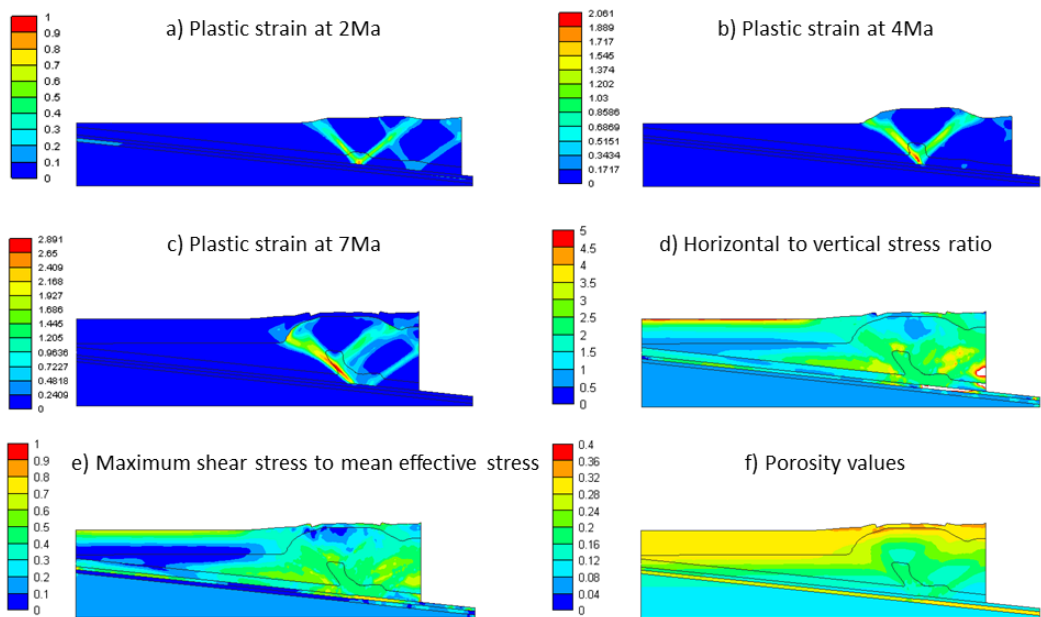

## Case 5

65

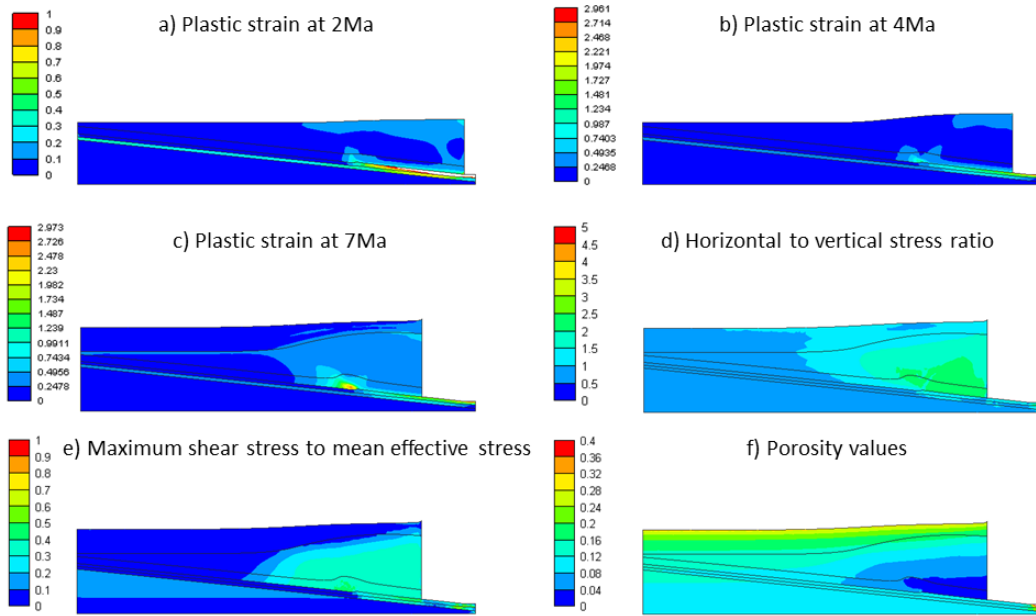

70

## Case 6

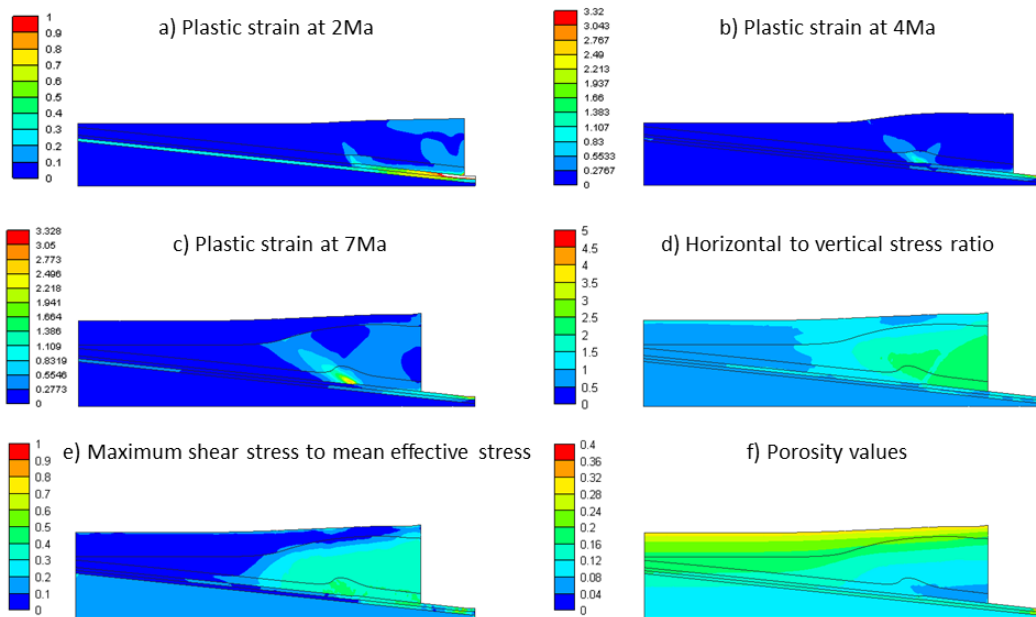

75

## Case 7

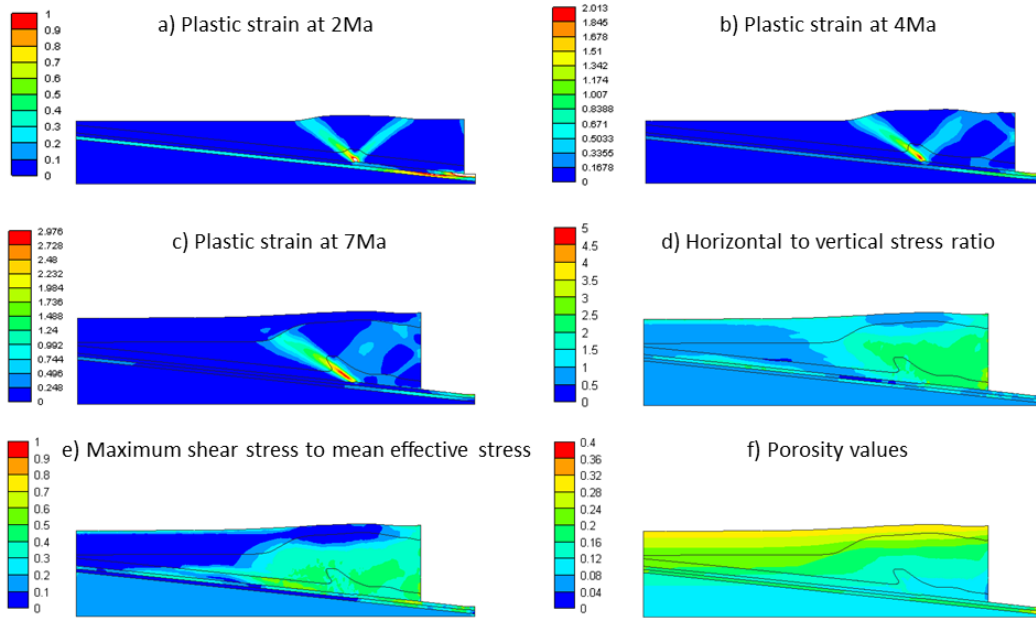

80

85

## Case 8

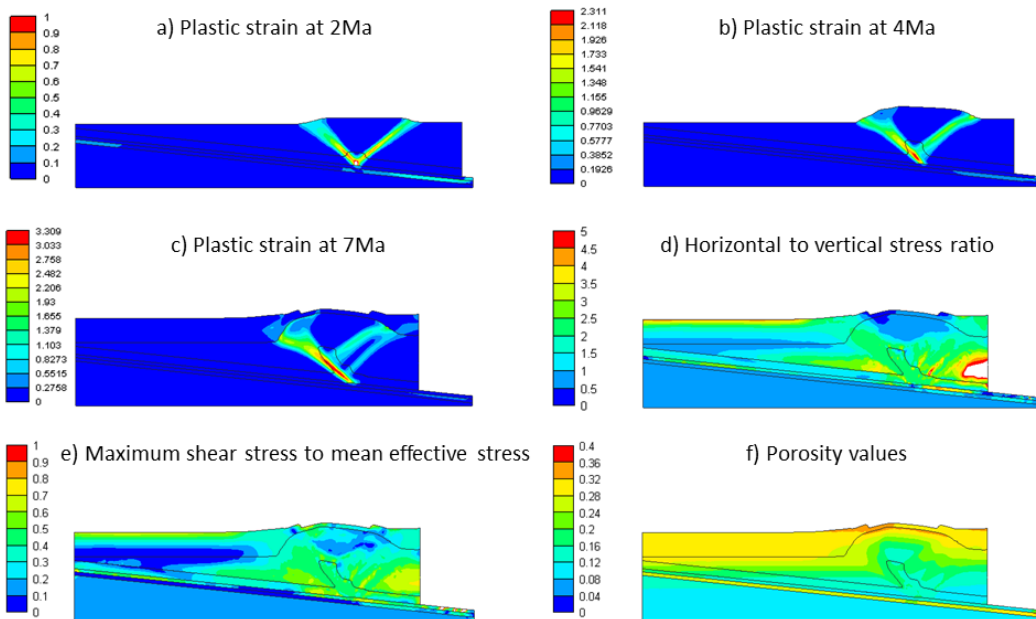

90

## Case 9

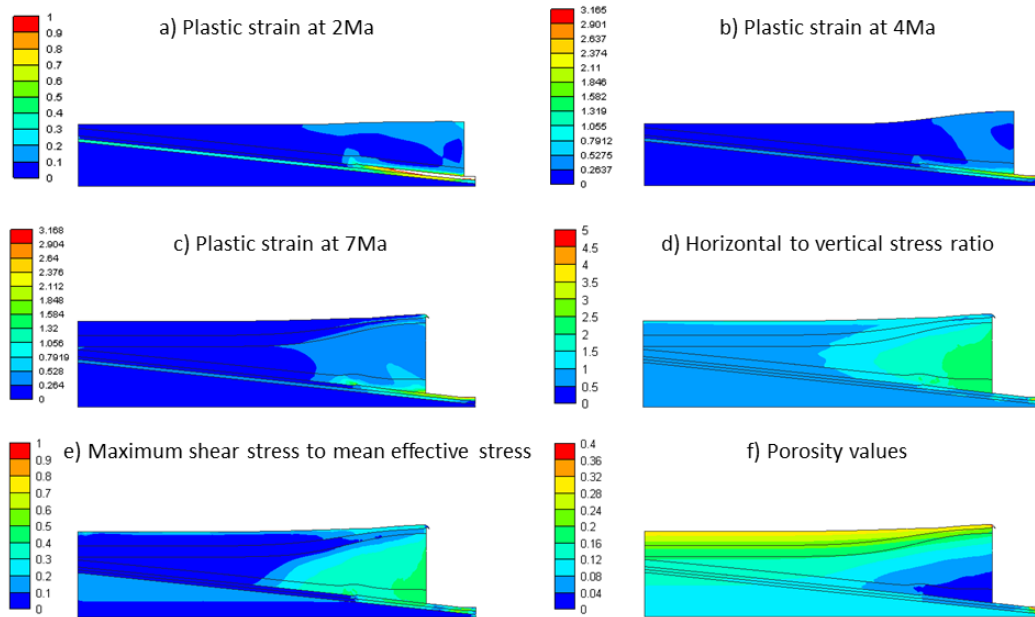

95

100

## Case 10

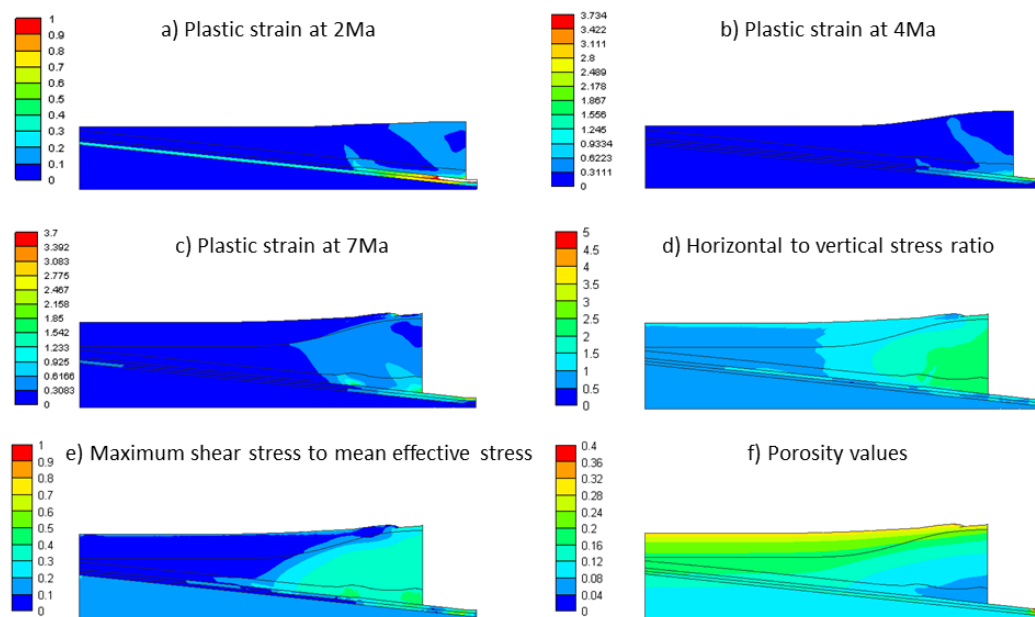

105

# Case 11

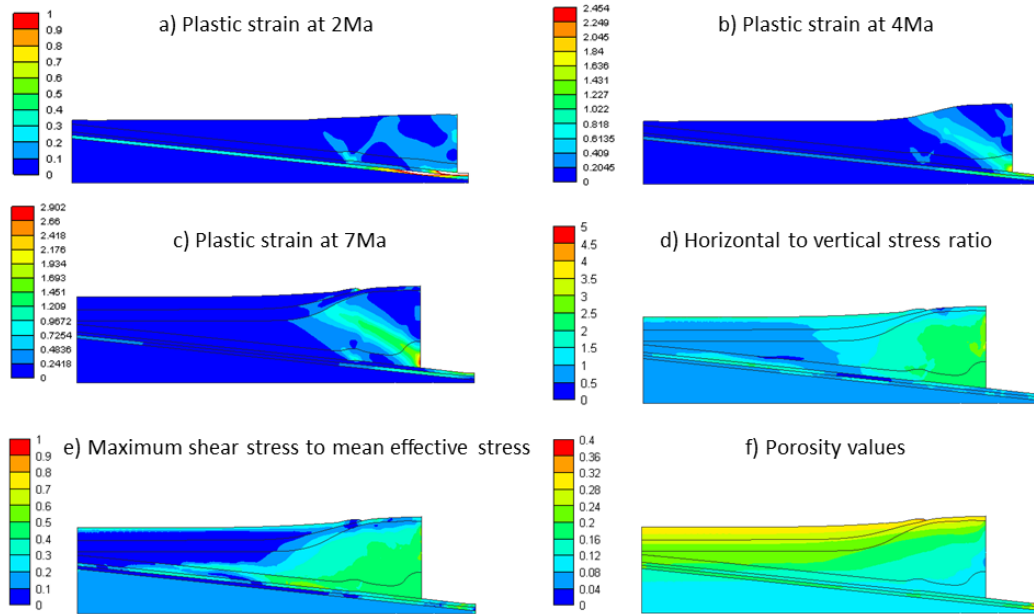

110

# Case 12

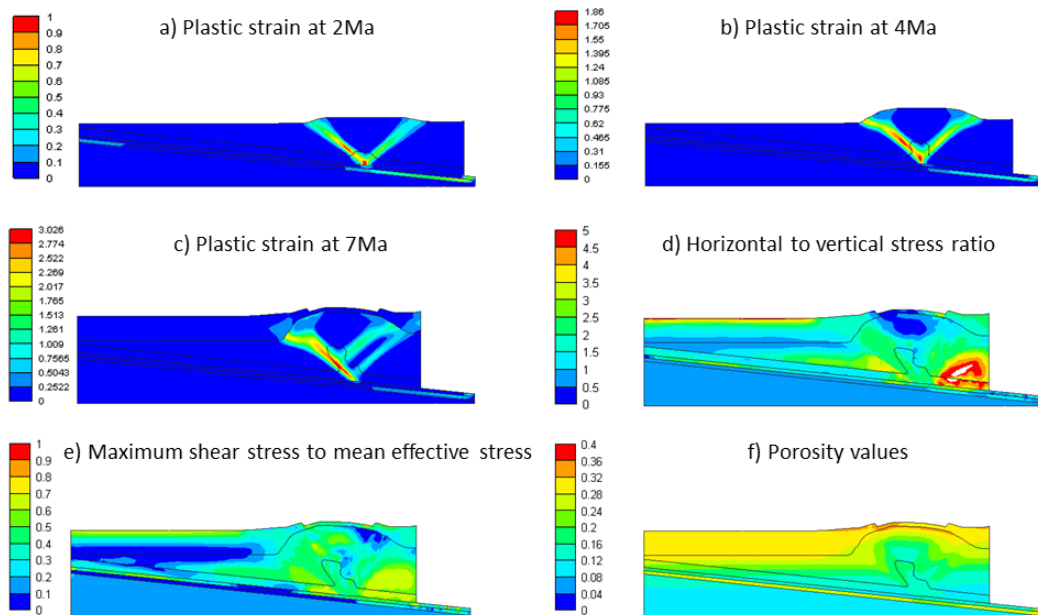

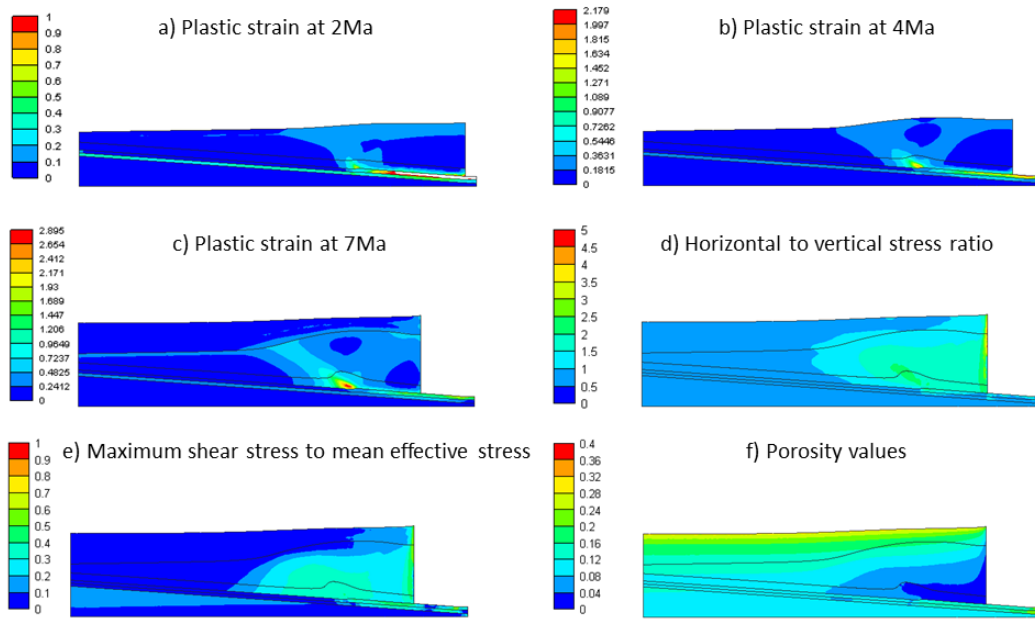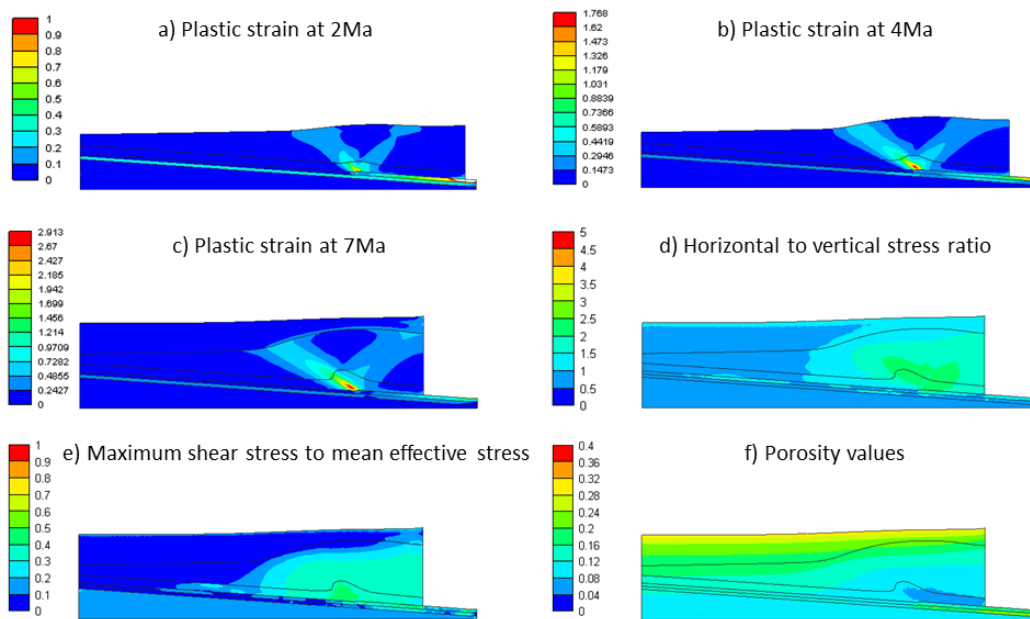



# Case 15

135

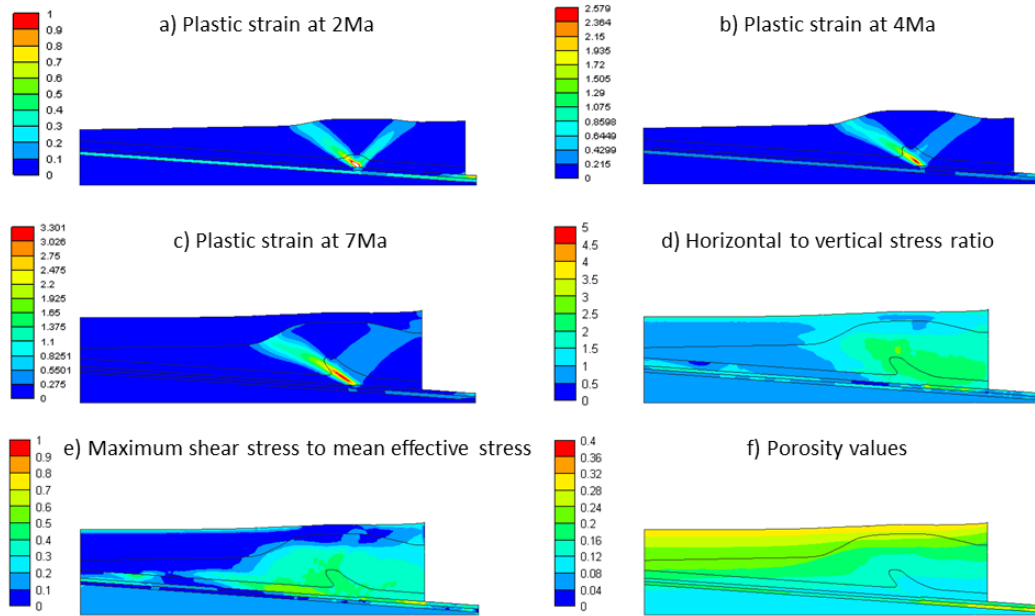

140

# Case 16

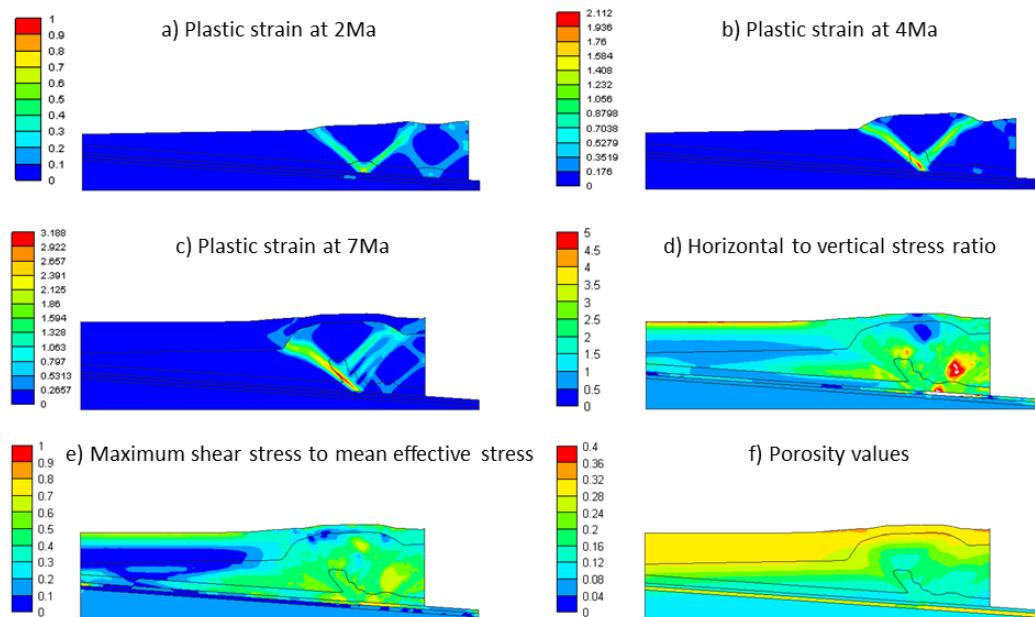

145

# Case 17

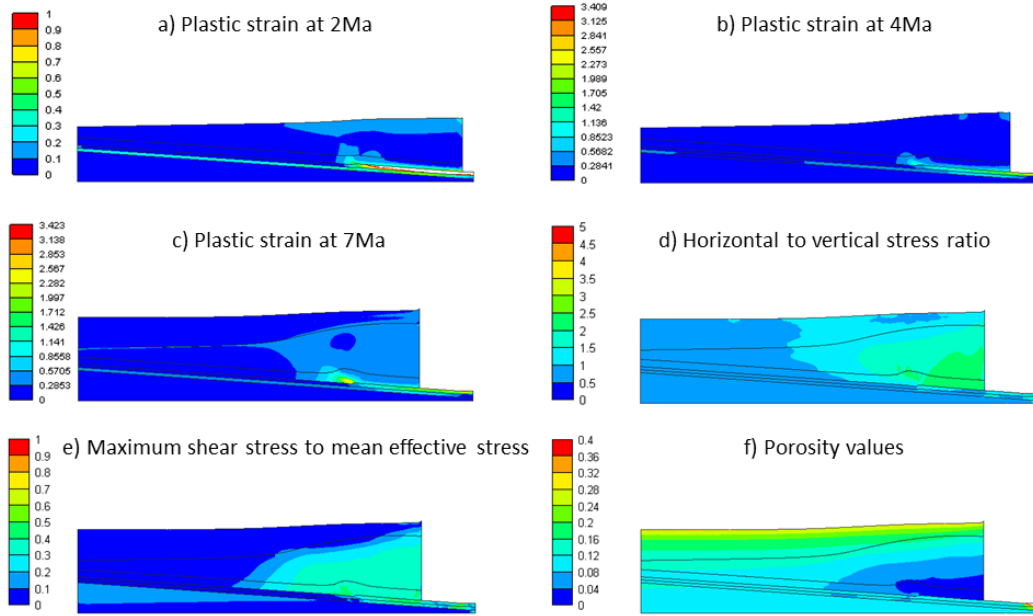

150

155

# Case 18

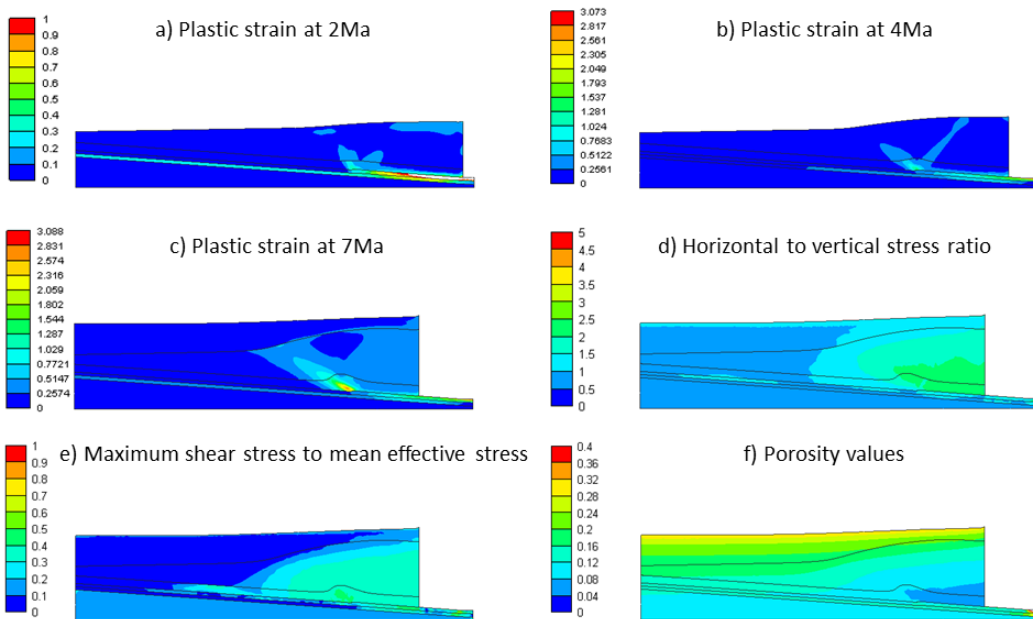

160

# Case 19

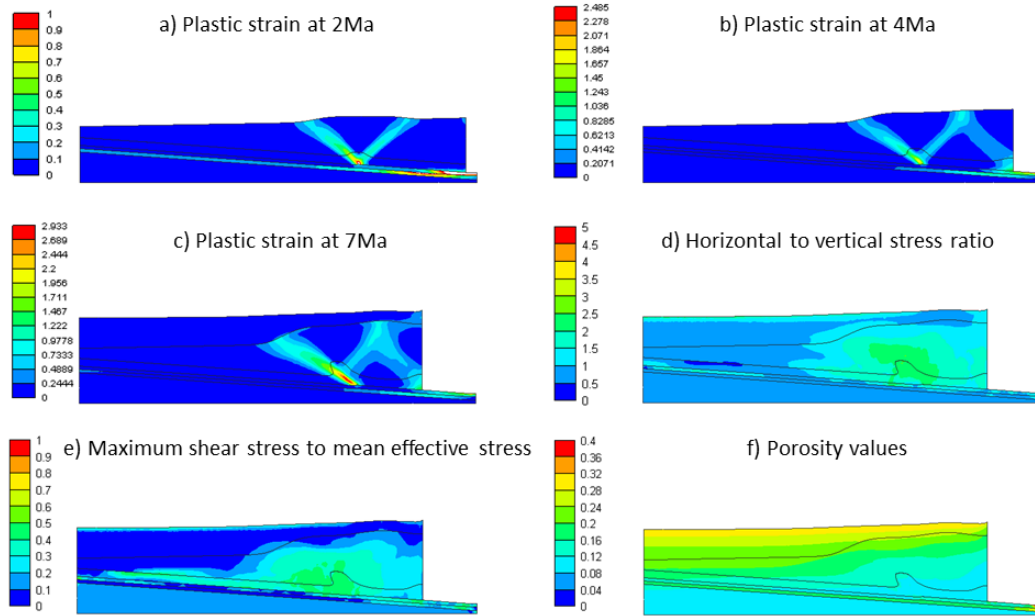

165

170

# Case 20

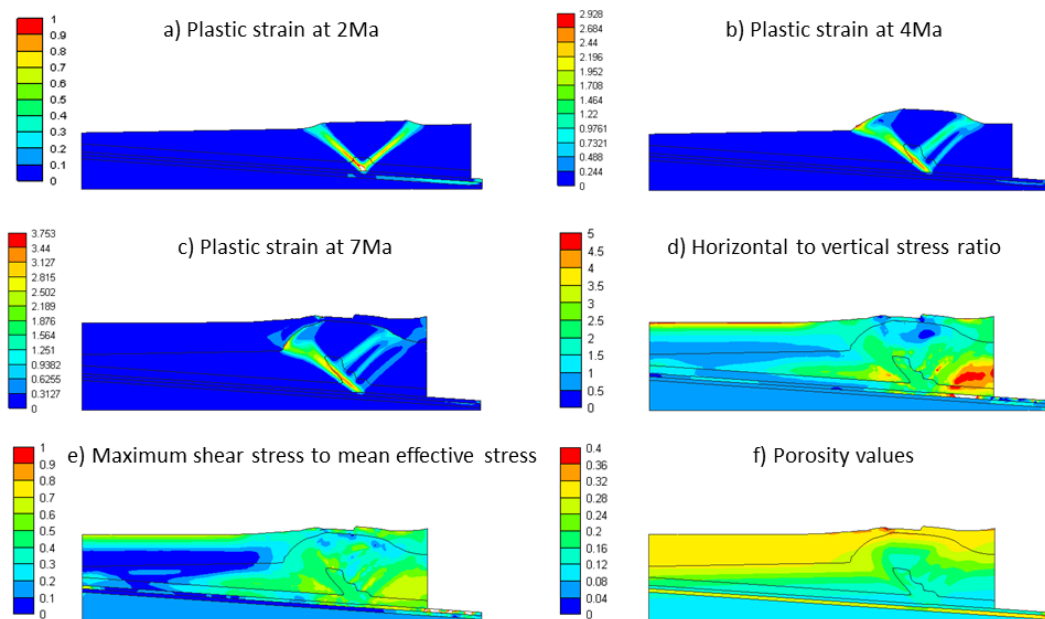

175

## Case 21

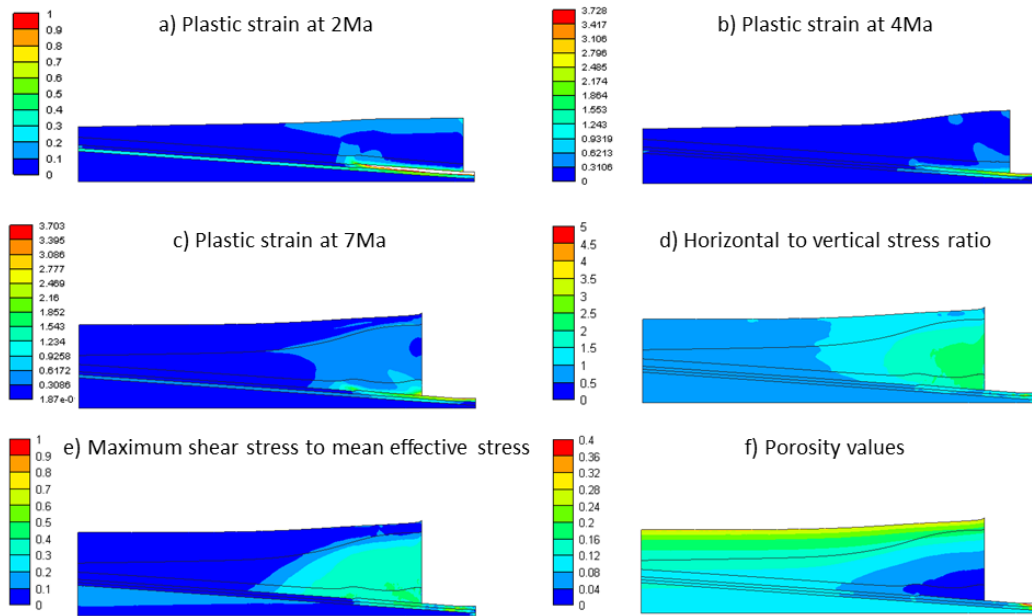

180

## Case 22

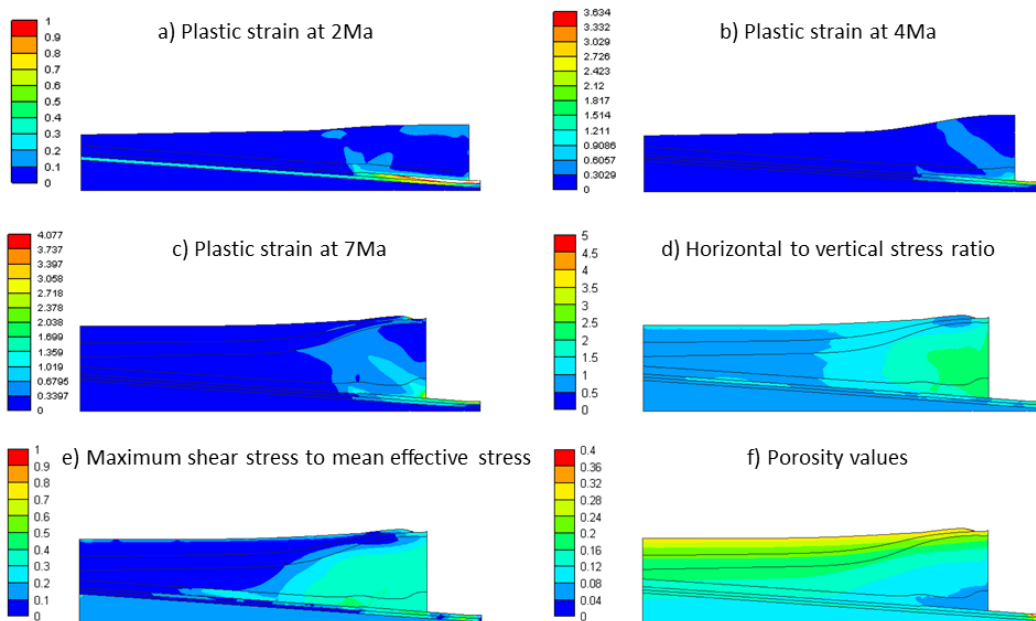

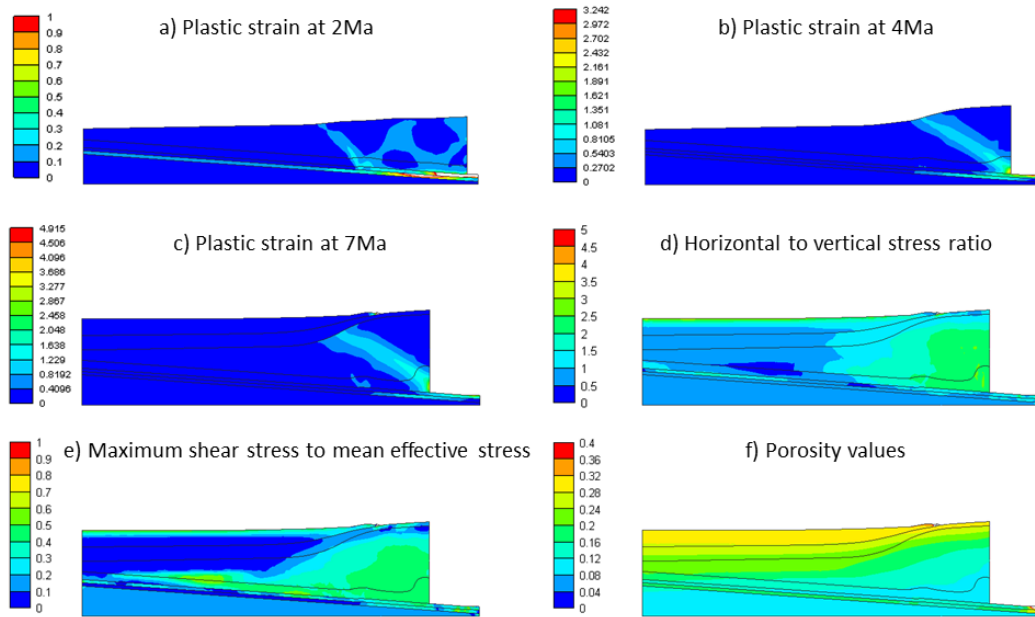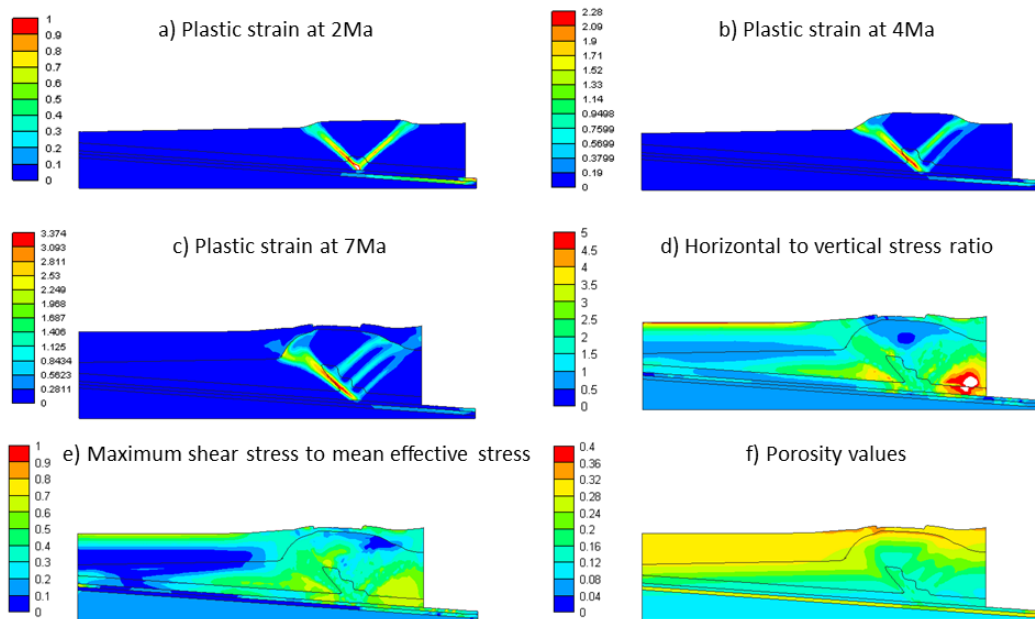

# Case 25

205

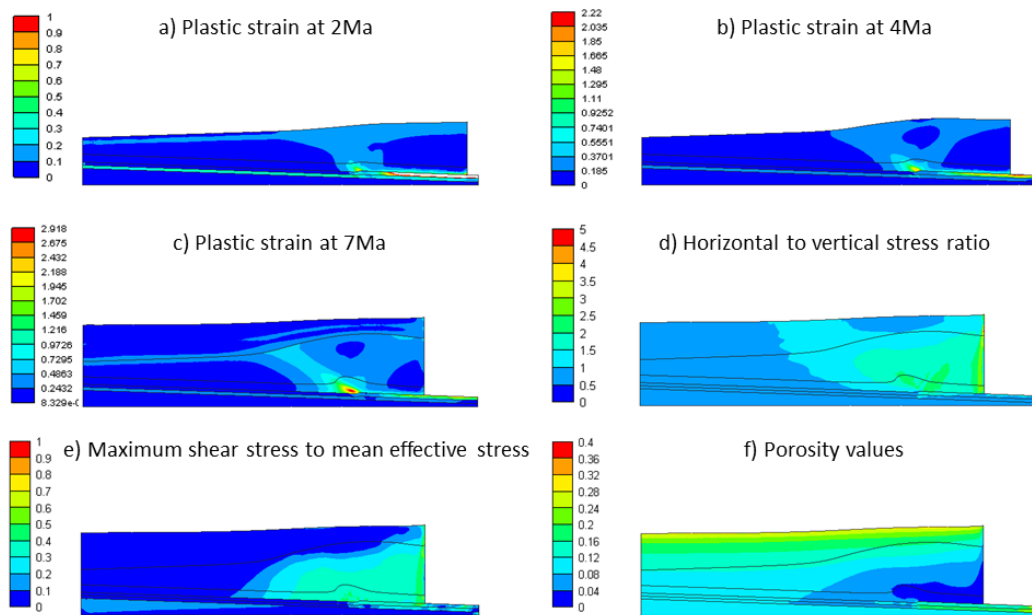

210

# Case 26

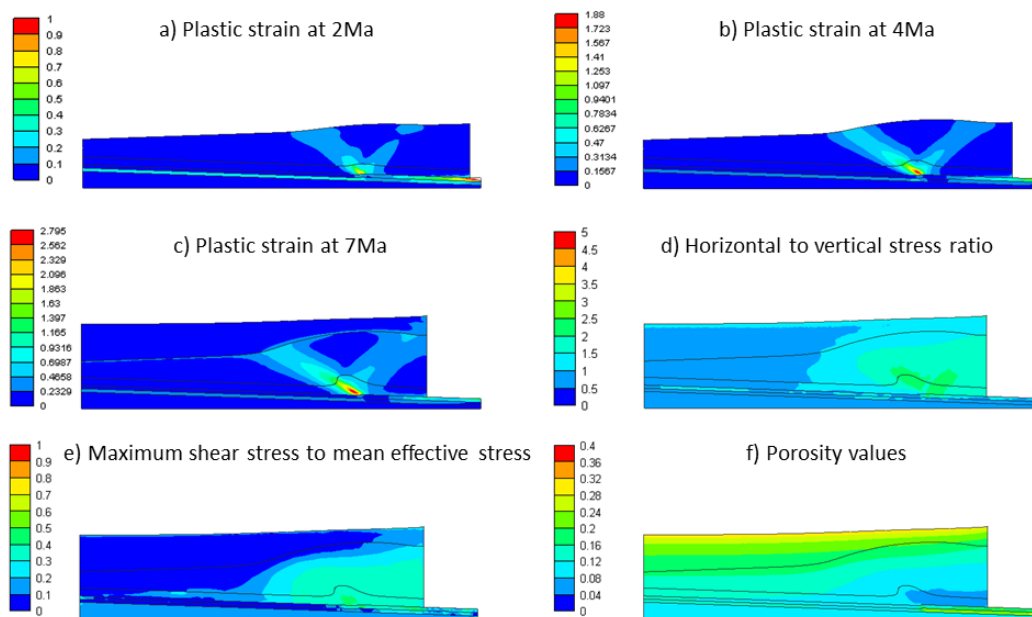

215

# Case 27

220

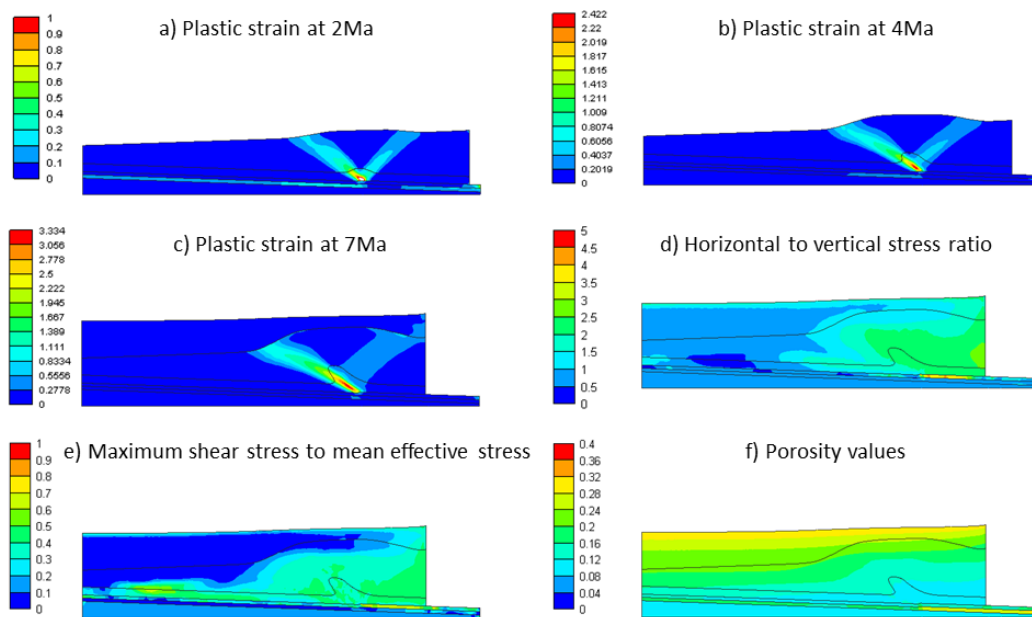

225

# Case 28

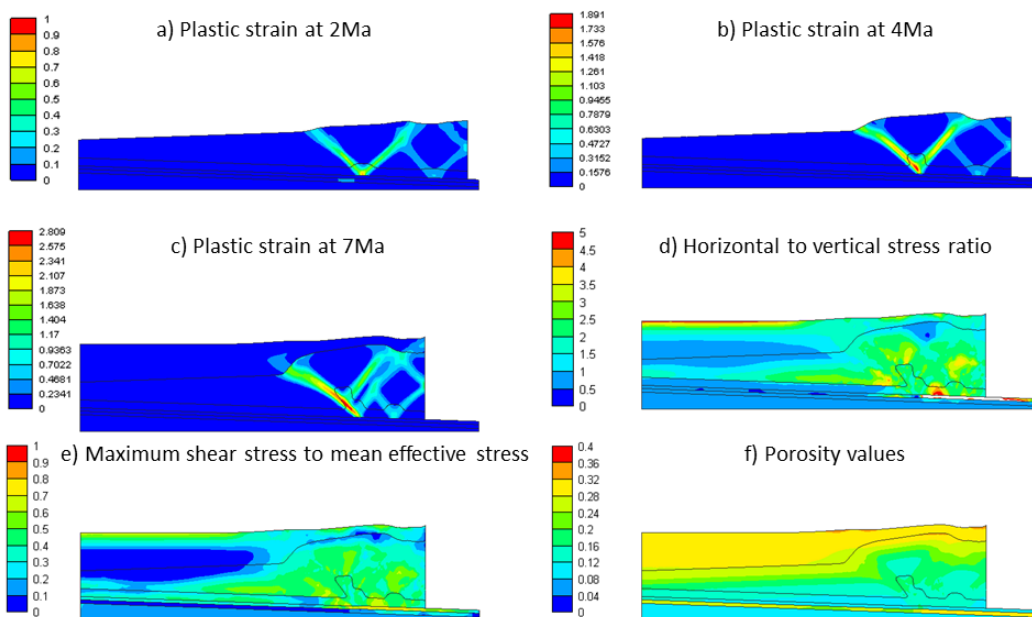

230

# Case 29

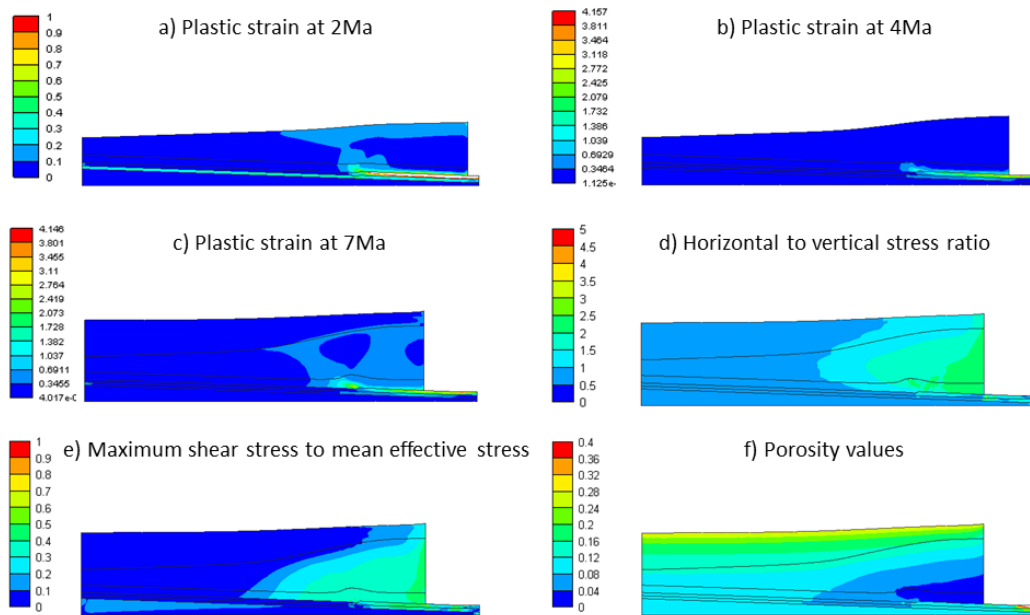

235

240

# Case 30

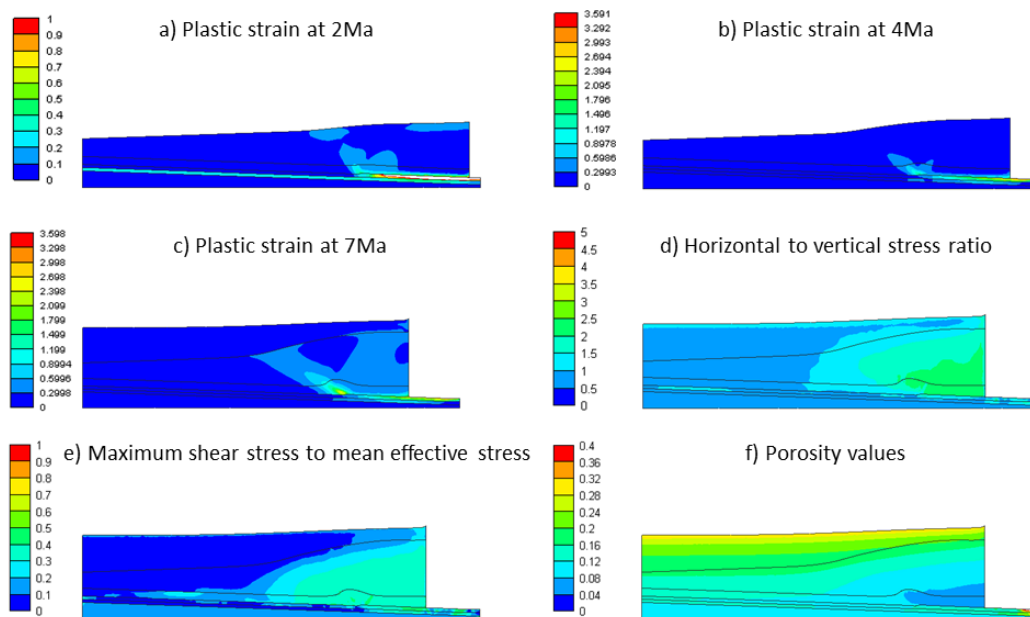

245



# Case 31

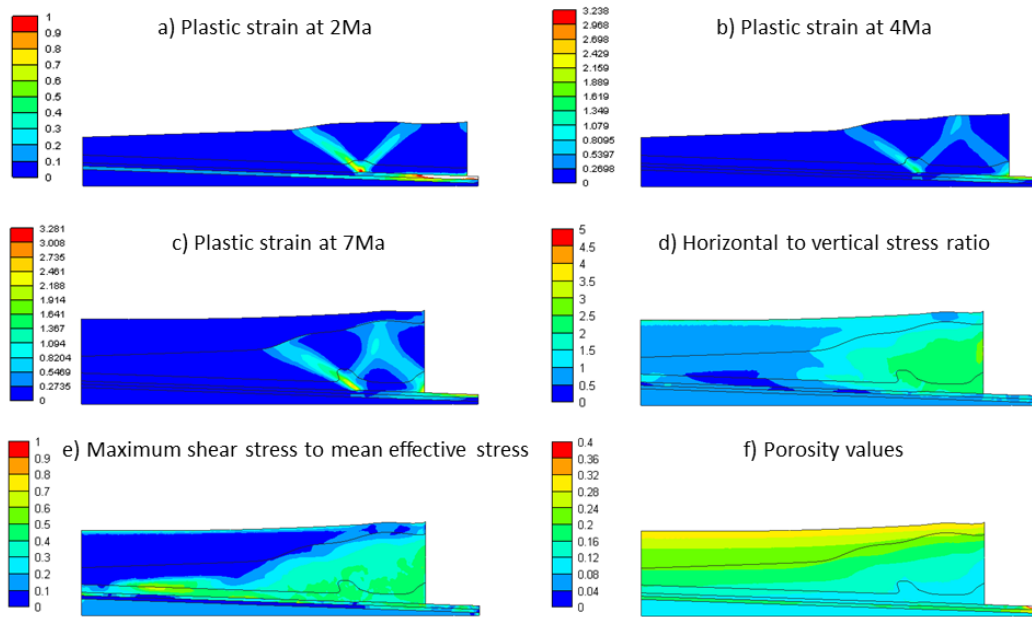

250

# Case 32

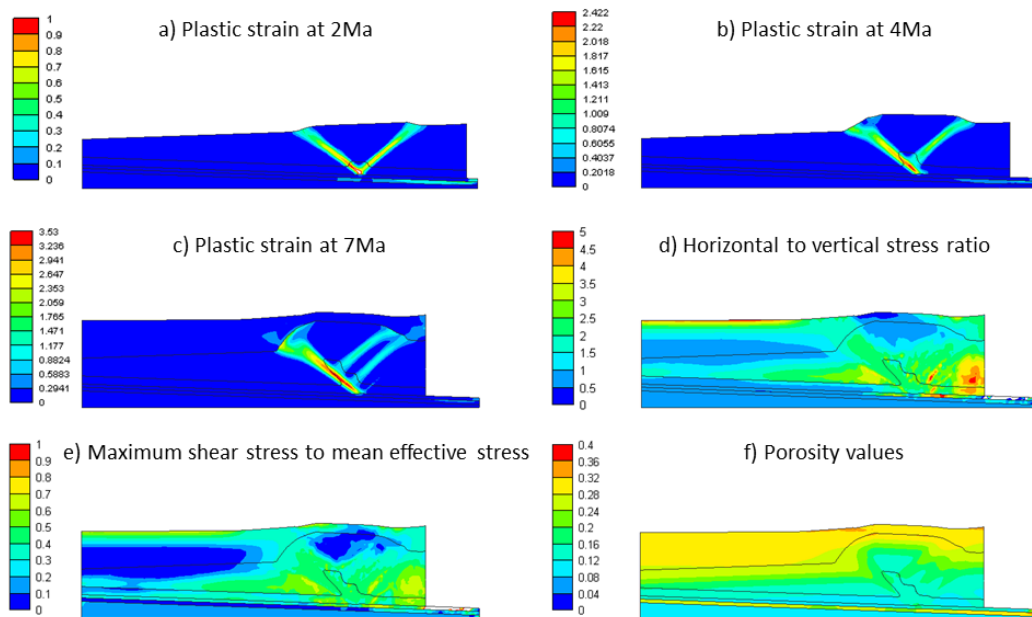

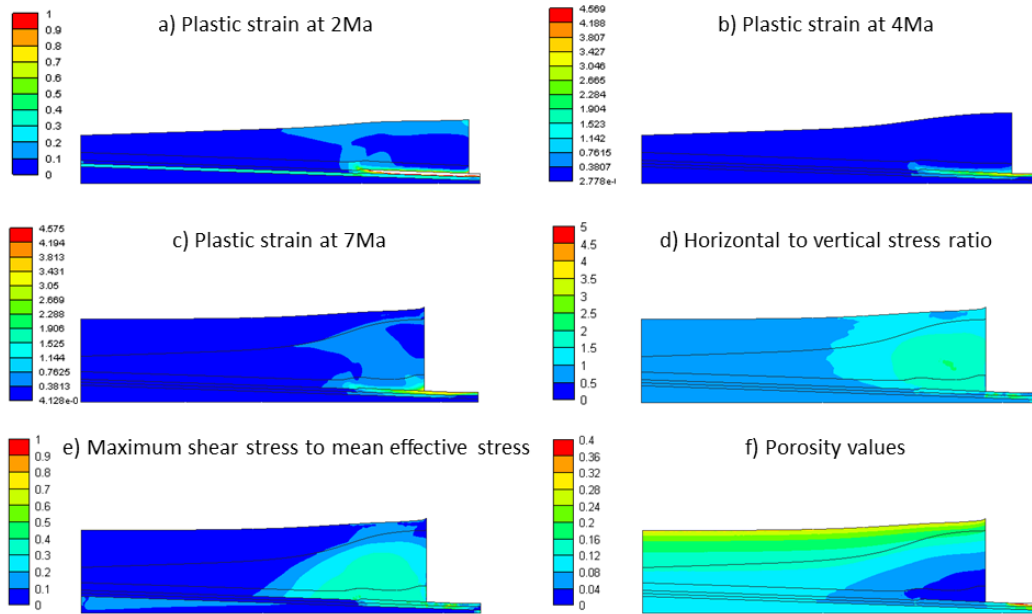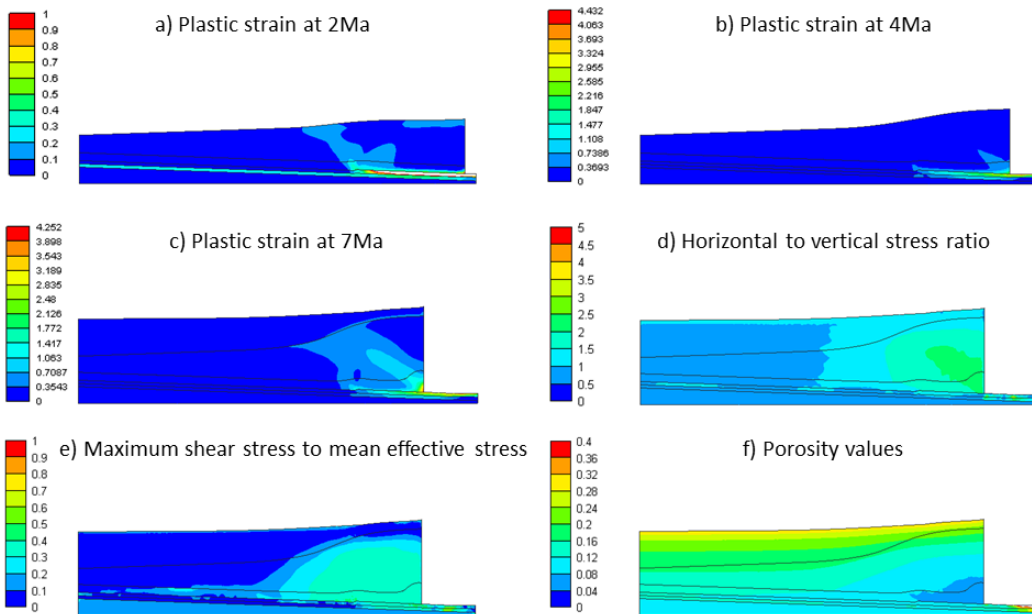

# Case 35

275

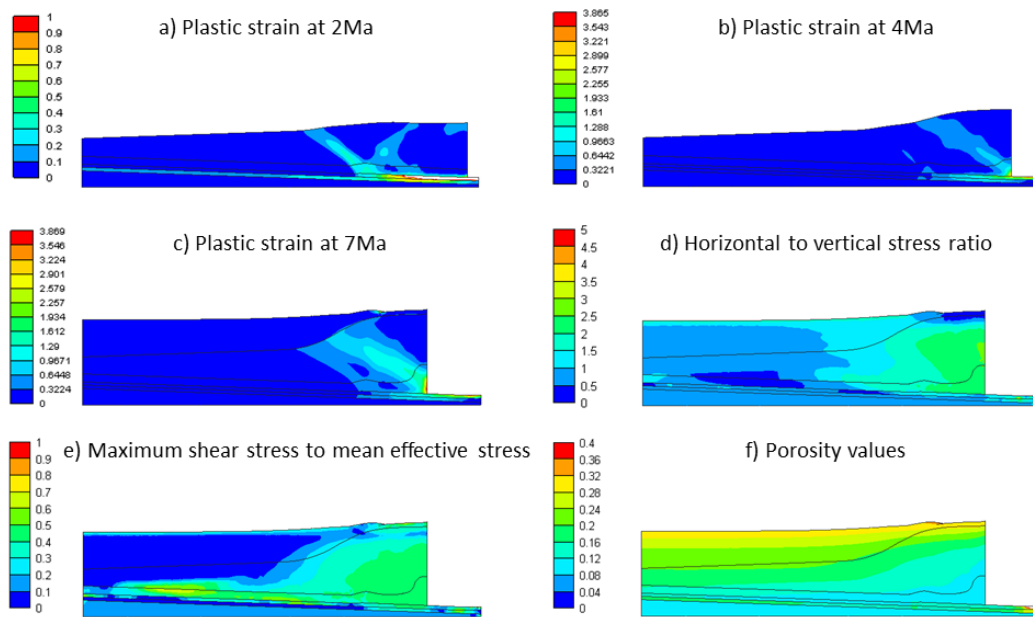

280

# Case 36

285

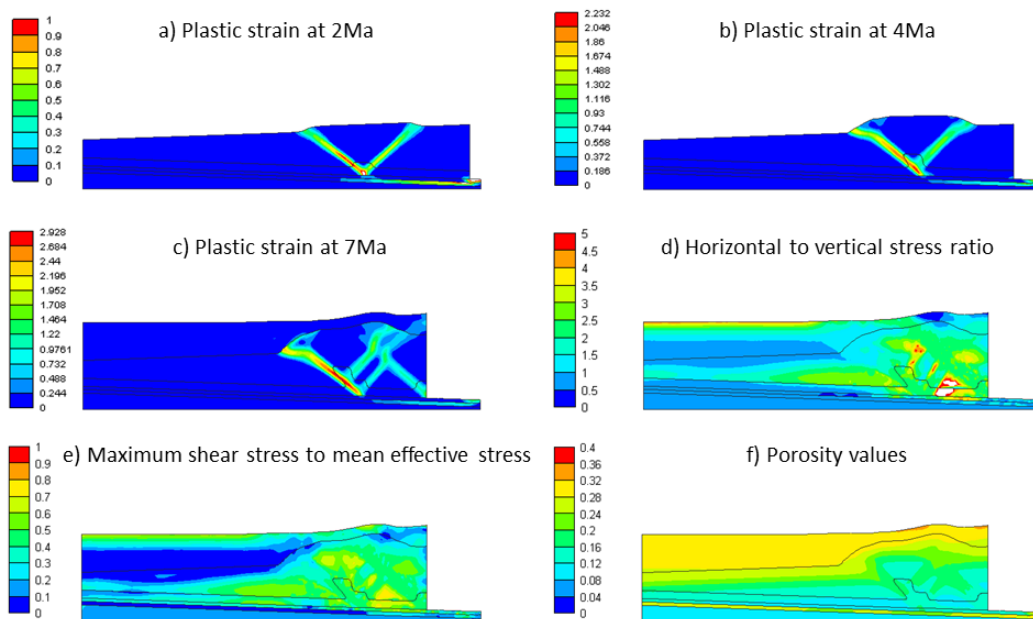

# Case 2\*

290

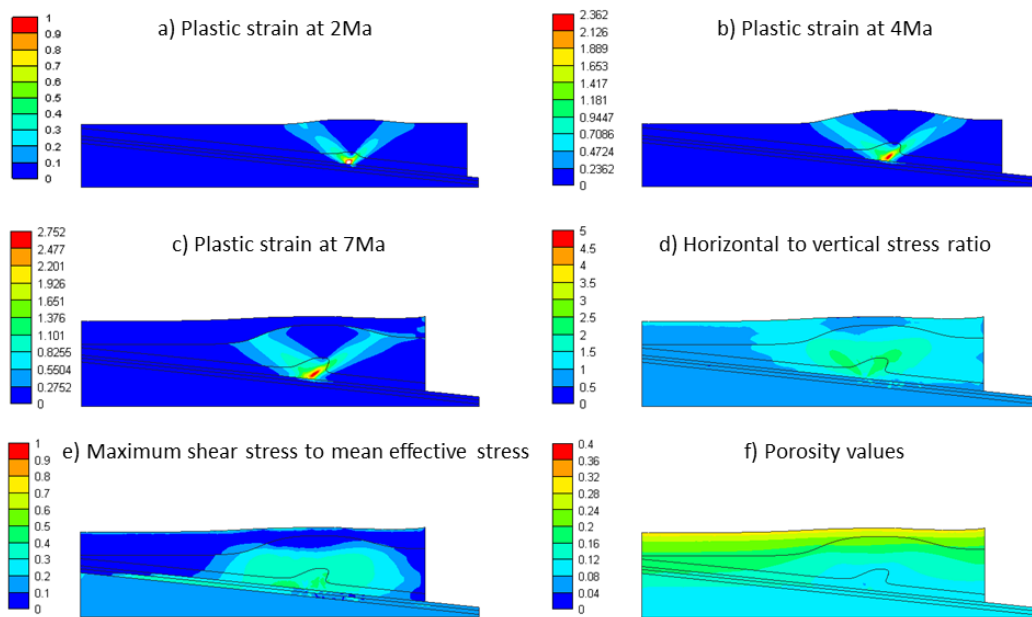

295

# Case 3\*

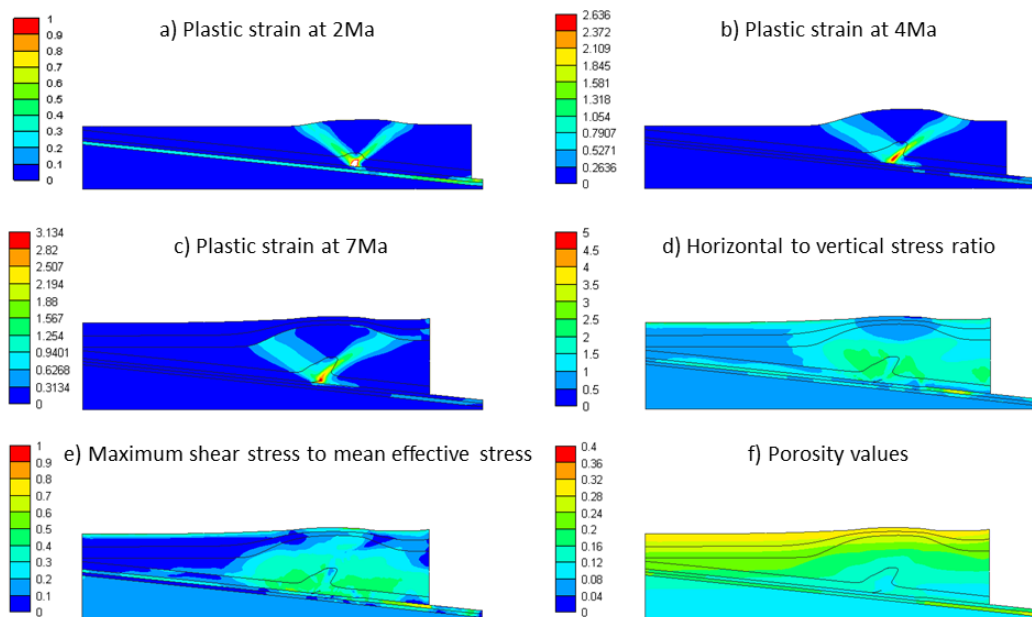

300

# Case 6\*

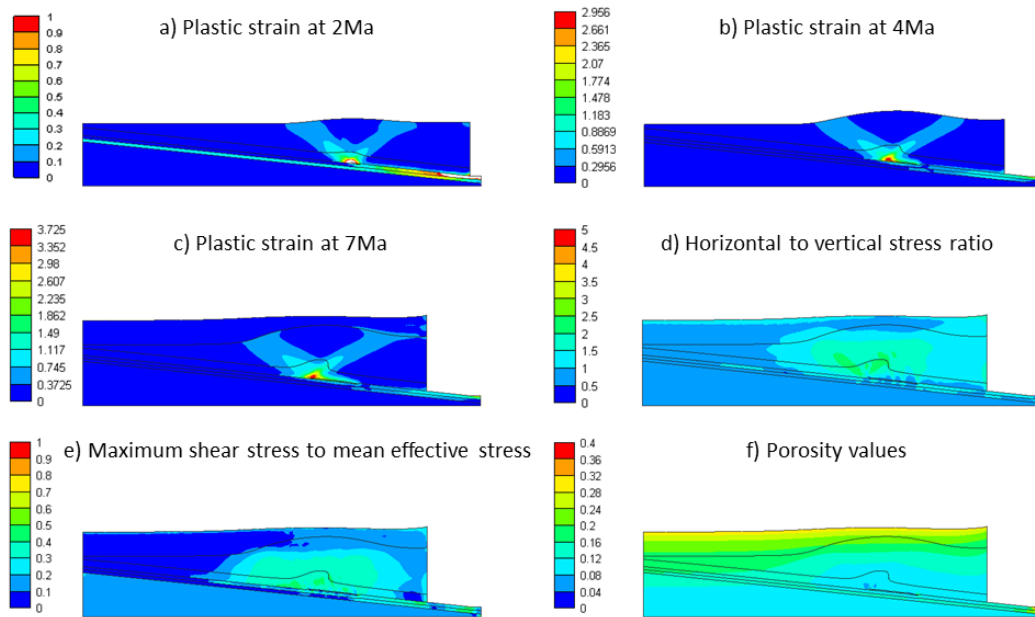

305

310

# Case 7\*

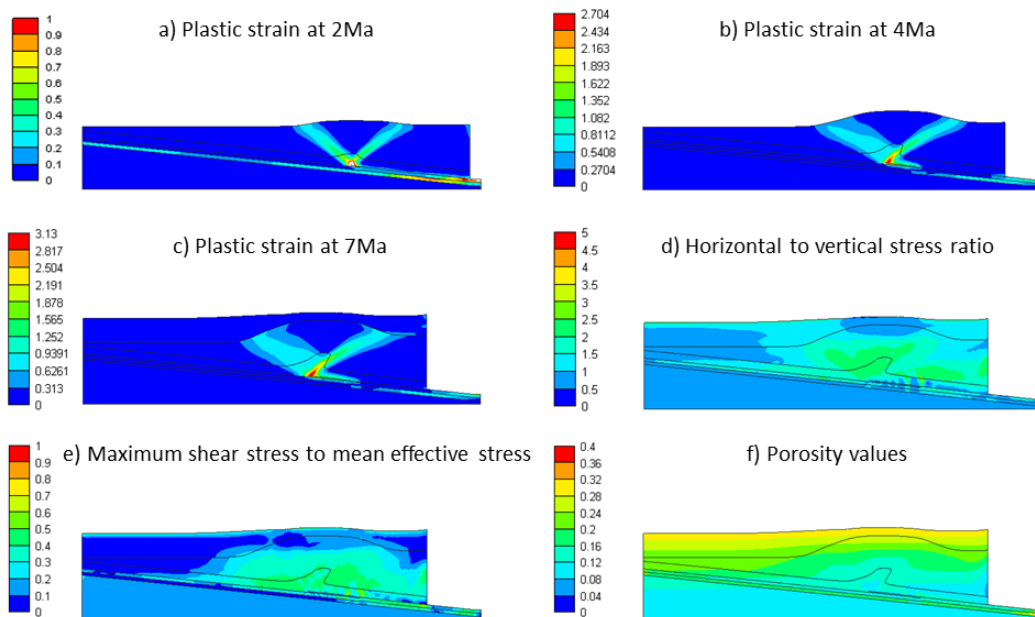

315

Case 34\*

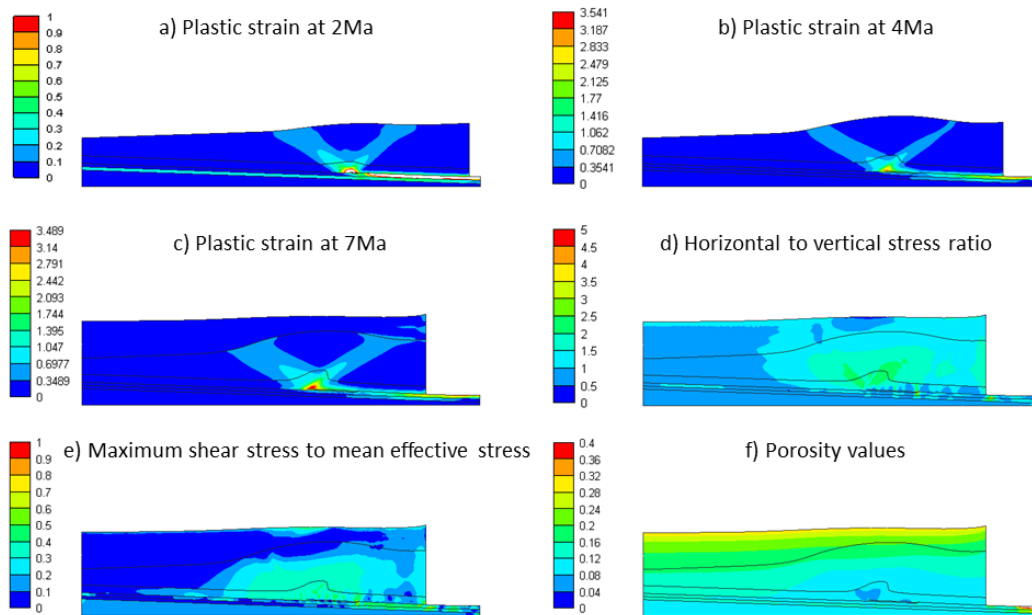

320

325 Case 35\*

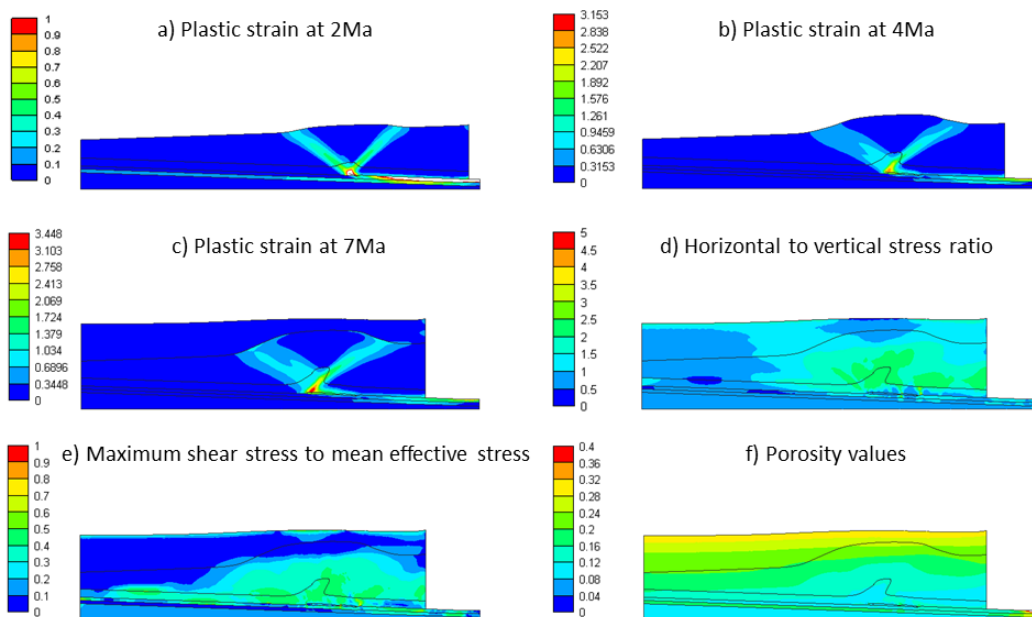

Supplement: Supplementary file 1 [file egusphere-2024-3134-supplement.zip]
